# Supplementary material for: Cell Type-Specific Promoters of Volvox carteri for Molecular Cell Biology Studies
Source: MDPI journal article supplement (doi:10.3390/genes14071389), 2023-07-01
Supplement: s1 [file s1]

## Supplementary Figure S1

|                                                                                                        |                                       |
|--------------------------------------------------------------------------------------------------------|---------------------------------------|
| <b><u>CTCGAG</u></b>                                                                                   | <i>Xho</i> I                          |
| CGATCCGATTCCGAAGCATATCAGGGCATGCCGCAATTCAACCGGGATAAGGGGTTTATCATGTT                                      |                                       |
| TCAATCCTTTGCGTCAAGGTTTCGACGGCTACCGTTGTCAGGTGAACGGTCATATCCACAGCAACGCCCCC                                |                                       |
| GACGCGTACAGCCATGGCAAAATAAAAACATGTTGTGACACATCACAATATAATTGACCGGCTGGCACATG                                | <i>PCY1</i><br>promoter<br>region     |
| CAAGGACAGCTCTTGACTGGATAGATATCCCTCGGCTGTCCGGACTGGTAATCCGCATGACGATCGGAGCA                                |                                       |
| GGCAACCTGGGAGGAATCTACGTTGTGTAATTAATTCAAAGTGAAAACTTTTTATATATCTGCAAGGTCAC                                |                                       |
| TACTTAAAGCACTTCAGTTGGAACACAGTATGATCATCTTGAATGTAACGAAGCCAACCTGCATACGTAAA                                |                                       |
| CAAATATATAAGTCTTCCAATCATCTCTATTTATCCATCCTCAATGTCTCTGGCCAATCTTATGCTGTCCA                                |                                       |
| TGTTGCTGCTACGGCTTCATGGGCCCTGTGGAATCTTATCATCCATCGTACTCGTTTGTTCATATAACAG                                 |                                       |
| GCTGTCAATTACCATCTATATTACACCTGGTCACAGCGTATTAATCCATTCTCAT <b><u>ATCGAT</u></b> GAAGAG <b><u>ATGG</u></b> | <i>Cla</i> I                          |
| <b><u>TCAACGGCGTGAAGGTGCTGTTTCGCCCTGATCTGCATCGCCGTGGCCGAGGCCAAGCCCACCGAGAACAAC</u></b>                 | V.c. Kozak<br>sequence                |
| GAGGACTTCAACATCGTGGCCGTGGCCAGCAACTTCGCCACCACCGACCTGGACGCCGACCGCGGCCAAGCT                               |                                       |
| GCCCCGCAAGAAGCTGCCCCCTGGAGGTGCTGAAGGAGATGGAGGCCAACGCCCGCAAGGCCGGCTGCACCC                               |                                       |
| GCGGCTGCCTGATCTGCCTGAGCCACATCAAGTGCACCCCCAAGATGAAGAAGTTCATCCCCGGCCGCTGC                                | <i>G-Luc</i>                          |
| CACACCTACGAGGGCGACAAGGAGAGCGCCCAGGGCGGCATCGGCGAGGCCATCGTGGACATCCCCGAGAT                                |                                       |
| CCCCGGCTTCAAGGACCTGGAGCCCATGGAGCAGTTTCATCGCCCAGGTGGACCTGTGCGTGGACTGCACCA                               |                                       |
| CCGGCTGCCTGAAGGGCCTGGCCAACGTGCAGTGCAGCGACCTGCTGAAGAAGTGGCTGCCCCAGCGCTGC                                |                                       |
| GCCACCTTCGCCAGCAAGATCCAGGGCCAGGTGGACAAGATCAAGGGCGCCGGCGGCGACGATACG <b><u>TAATC</u></b>                 | <i>Xba</i> I                          |
| <b><u>TAGA</u></b> TAAATTTCCTGGTGGAGTCATTGTGTTGGAGCCATTGGAGCTCTGCAAGAGTGGCATTATCAAGAACG                | <i>Lhcbm1</i><br>terminator<br>region |
| TTCACGCGCGGAAGGGATATTTAGTGGCTGTCTGAGCGTAGAGTGATACCCACATCTTGGGTTTGTAAACAT                               |                                       |
| AAATCTGATGTGATCCGATGTATCTTATCTATCTGTTTATTGCTTGGACAATTTTCGGCATTATTAGGCA                                 |                                       |
| GATGGACTGTGATAATGTAGAGCAGCCGAGAAATATGCACTGAAAGCAGGAAGCTAAACACGAAAACAATG                                |                                       |
| TATGCGGGCTCG <b><u>GCGGCCGC</u></b>                                                                    | <i>Not</i> I                          |

**Insert sequence of the vector pPCY1-Luc.** The vector pPCY1-Luc carries a 617 bp DNA fragment containing the *V. carteri* *PCY1*-promoter region, the 570 bp coding sequence of *Gaussia princeps* luciferase (*G-Luc*), and a 292 bp fragment containing the *V. carteri* *Lhcbm1* terminator region. The gene entries of *PCY1* and *Lhcbm1* in the current *Volvox carteri* genome version 2.1 in Phytozome 13 are Vocar.0015s0197 (*PCY1* gene) and Vocar.0001s0479 (*Lhcbm1* gene). The *PCY1* gene is on scaffold 15 at nucleotide positions 1482932 bp to 1484377 bp (forward). The *Lhcbm1* gene is on scaffold 1 at nucleotide positions 3740810 bp to 3742363 bp (forward). For the vector construction, pBluescript II SK (–) (Agilent Technologies, Santa Clara, CA, USA) was used as a backbone, because it includes an origin of replication of *E. coli* and an ampicillin resistance cassette. The sequence of pBluescript II SK (–) is as in GenBank (acc. no. X52330) but not shown here. The DNA fragments were inserted between the *Xho*I and *Not*I sites of the multiple cloning site of pBluescript II SK (–). The background colors indicate the following sequence features: green, *PCY1* promoter region; gray, *V. carteri* Kozak sequence; yellow, coding sequence of *G-Luc*; orange, *Lhcbm1* terminator region. Start and stop codons are highlighted (violet font). Relevant restriction sites are marked (bold, underlined).
