# Supplementary material for: Cell Type-Specific Promoters of Volvox carteri for Molecular Cell Biology Studies
Source: MDPI journal article supplement (doi:10.3390/genes14071389), 2023-07-01
Supplement: s1 [file s1]

## Supplementary Figure S3

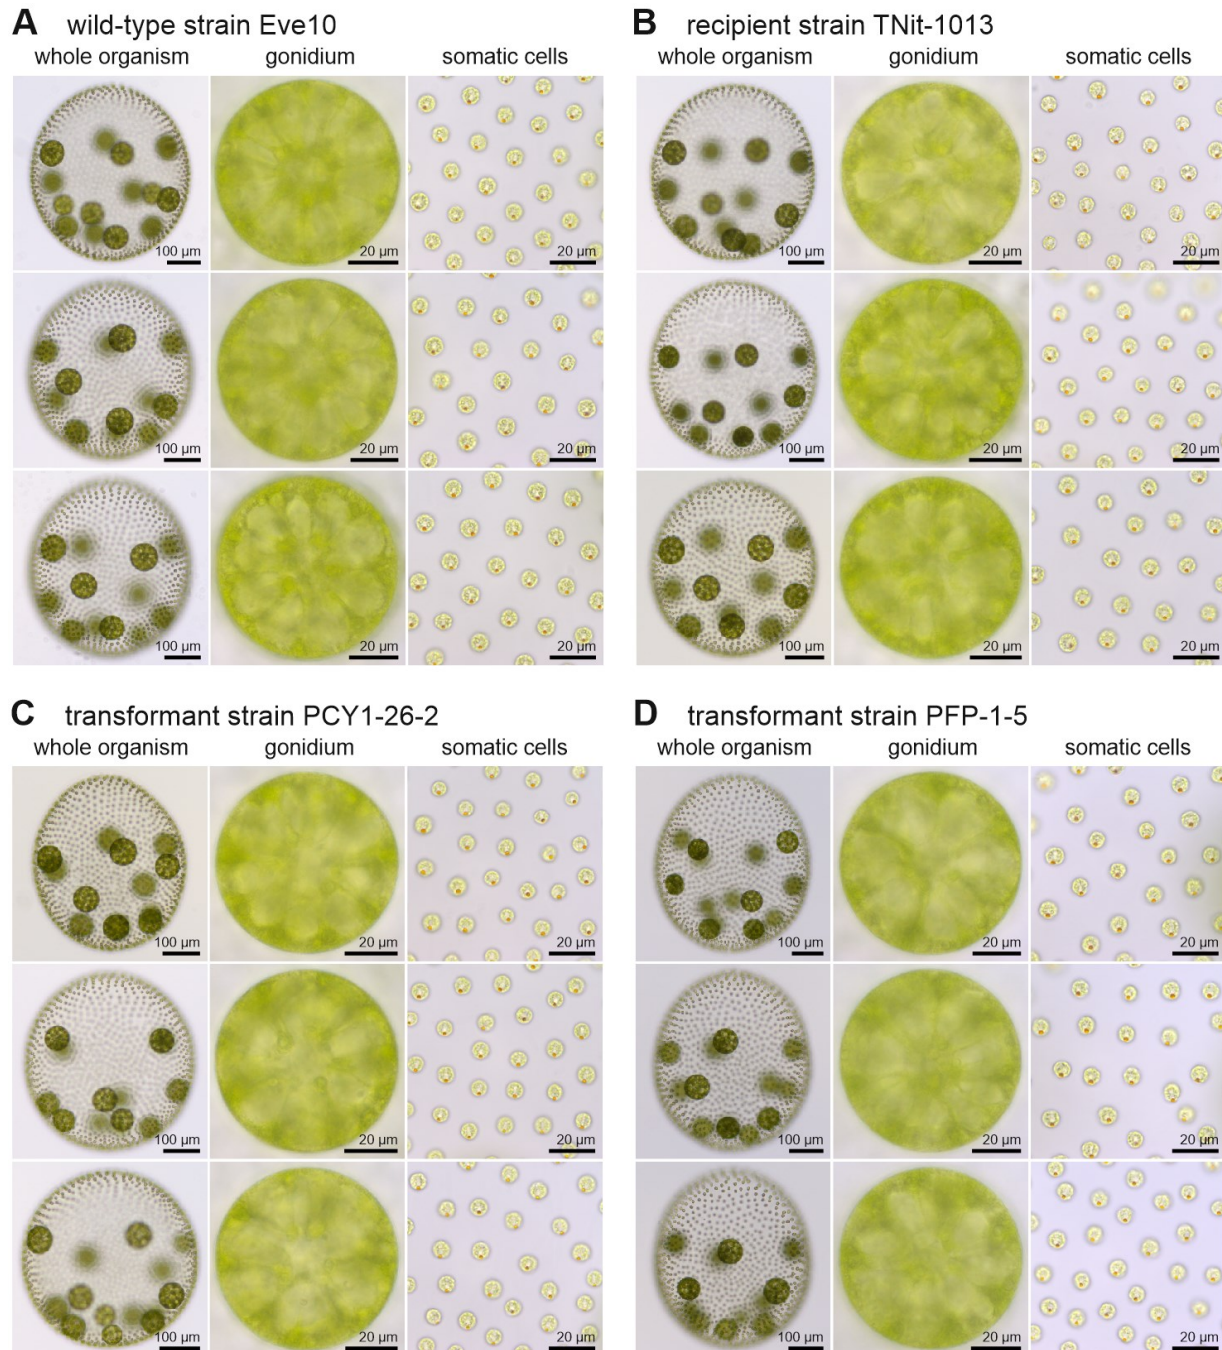

**Phenotypes of wild-type, recipient and transformant *V. carteri* strains.** For each strain, three example micrographs of the phenotype of the whole organism and enlarged views of a gonidium and some somatic cells are shown. Micrographs of whole organisms, gonidia and somatic cells were taken 4 h before onset of the dark phase of the 8 h dark/16 h light cycle, which corresponds to the stage just before onset of embryogenesis. **A** Wild-type strain Eve10. **B** Nitrate-reductase deficient recipient strain TNit-1013. **C** Transformant strain PCY1-26-2 expressing the reporter gene *G-Luc* under control of the *PCY1* promoter. **D** Transformant strain PFP-1-5 expressing the reporter gene *G-Luc* under control of the *PFP* promoter.
