# Supplementary material for: Cell Type-Specific Promoters of Volvox carteri for Molecular Cell Biology Studies
Source: Genes (Basel). 2023 Jul 1;14(7):1389. doi: 10.3390/genes14071389 (PMC10379329; doi:10.3390/genes14071389)
Supplement: Supplementary file 1 [file genes-14-01389-s001.zip]

Archive with 4 entries (4 files):
- Supplementary Figure_S3.pdf
- Supplementary Table S1.xlsx
- Supplementary Figure_S1.pdf
- Supplementary Figure_S2.pdf
