# Supplementary material for: Cell Type-Specific Promoters of Volvox carteri for Molecular Cell Biology Studies
Source: Genes (Basel). 2023 Jul 1;14(7):1389. doi: 10.3390/genes14071389 (PMC10379329; doi:10.3390/genes14071389)
Supplement: Supplementary file 1 [file genes-14-01389-s001.zip › Supplementary Table S1.xlsx]

## Sheet: Table S1
	Supplementary Table S1
	Genes and encoded proteins with both very strong and cell type-specific overexpression in somatic cells and gonidia, respectively.
		tag	common protein name	Volvox 2.1 gene ID	baseMean	baseMean in gonidia	baseMean somatic cells	fold overexpression in relation to the other cell type	log2 fold difference in expression	p adjusted	classification: overexpression in …	Best BLAST Hit in C. reinhardtii	% similarity to the best BLAST hit in C. reinhardtii
	soma specific proteins
		s1	PLAC8 family protein (PFP)	Vocar.0032s0153	124146	12670.7	235621	18.5957	4.2169	2.31267e-30	somatic cells	Cre16.g695700	0.76
		s2	cathepsin	Vocar.0059s0039	135132	10462.6	259801	24.8315	4.6341	4.64908e-35	somatic cells	no hit	-
		s3	flagella associated protein	Vocar.0070s0007	168528	15149.4	321906	21.2488	4.40931	1.70366e-32	somatic cells	Cre02.g077850	0.71
		s4	small cysteine-rich extracellular protein	Vocar.0059s0041	63094.1	3963.97	122224	30.8338	4.94644	1.06644e-38	somatic cells	no hit	-
		s5	pherophorin I (phI)	Vocar.0004s0255	83000.8	7038.38	158963	22.5852	4.49731	9.99977e-34	somatic cells	Cre14.g620600	0.59
		s6	α-tubulin (tubA1)	Vocar.0035s0137	175307	50327.1	300287	5.96671	2.57694	4.45172e-14	somatic cells	Cre03.g190950	1
		s7	hypothetical protein	Vocar.0007s0404	104366	13211.7	195521	14.7991	3.88743	2.07061e-27	somatic cells	no hit	-
		s8	gametolysin peptidase M11	Vocar.0016s0064	125163	19926.4	230400	11.5626	3.53139	2.69311e-23	somatic cells	Cre01.g025200	0.69
		s9	β-tubulin (tubB2)	Vocar.0007s0229	161593	36234.4	286952	7.91931	2.98537	8.76096e-18	somatic cells	Cre12.g549550	1
		s10	gametolysin (g-lysin)	Vocar.0007s0366	80291.7	9410.49	151173	16.0643	4.00579	2.14377e-28	somatic cells	Cre01.g025200	0.65
		s11	α-tubulin (tubA2)	Vocar.0013s0278	235010	65584.4	404435	6.16663	2.62448	2.42777e-14	somatic cells	Cre04.g216850	1
		s12	PLAC8 family related protein	Vocar.0001s1548	78468.6	10623.3	146314	13.773	3.78377	5.03868e-26	somatic cells	Cre02.g145900	0.71
		s13	hypothetical protein	Vocar.0015s0089	76700.2	10595.2	142805	13.4784	3.75257	1.45191e-25	somatic cells	no hit	-
		s14	β-tubulin (tubB1)	Vocar.0007s0110	135505	34555.1	236455	6.84285	2.7746	3.64861e-16	somatic cells	Cre12.g542250	1
		s15	pherophorin V1 (phV1)	Vocar.0034s0104	85323.3	14159	156488	11.0522	3.46626	7.58854e-23	somatic cells	Cre14.g620600	0.54
		s16	hypothetical protein	Vocar.0003s0418	57914.1	6925.79	108902	15.7242	3.97491	3.85486e-28	somatic cells	no hit	-
		s17	membrane-bound transcription factor peptidase	Vocar.0003s0105	66214.7	10446.3	121983	11.6772	3.54562	2.25309e-23	somatic cells	Cre09.g406700	0.59
		s18	pherophorin SSG185	Vocar.0002s0564	50528.1	7583.53	93472.6	12.3257	3.6236	6.99905e-24	somatic cells	Cre06.g278162	0.73
	gonidia specific proteins
		g1	plastocyanin 1 (PCY1)	Vocar.0015s0197	31127.9	59661.5	2594.28	22.9973	-4.52339	1.21689e-05	gonidia	Cre03.g182551	0.91
		g2	pherophorin V54 (phV54)	Vocar.0003s0026	13889	27323.7	454.214	60.1561	-5.91064	1.62565e-12	gonidia	Cre17.g717950	0.56
		g3	chlorophyll a/b binding protein	Vocar.0020s0067	20391.7	39574.7	1208.64	32.7433	-5.03313	1.16737e-11	gonidia	Cre08.g367400	0.87
		g4	ferredoxin (petF)	Vocar.0002s0012	16538.2	32200.5	875.822	36.7661	-5.2003	0.000134668	gonidia	Cre14.g626700	0.85
		g5	thiamine thiazole synthase 1	Vocar.0025s0047	23946.8	45911	1982.61	23.1569	-4.53337	1.75039e-22	gonidia	Cre04.g214150	0.95
		g6	pherophorin V53 (phV53)	Vocar.0003s0025	7012.23	13842.4	182.022	76.0481	-6.24884	8.89097e-18	gonidia	Cre17.g717950	0.55
		g7	formate transporter related protein	Vocar.0030s0055	23573.9	44782.3	2365.46	18.9317	-4.24274	8.90106e-05	gonidia	Cre06.g309000	0.86
		g8	ATP-energized ABC transporter	Vocar.0012s0088	31629.5	58576.8	4682.24	12.5104	-3.64506	5.64768e-05	gonidia	Cre02.g097800	0.92
		g9	acyl carrier protein 4	Vocar.0006s0130	23212.1	43823.3	2600.88	16.8494	-4.07462	1.1152e-05	gonidia	Cre13.g577100	0.8
		g10	pherophorin V51 (phV51)	Vocar.0003s0023	7118.49	13981.7	255.277	54.7707	-5.77533	1.91323e-44	gonidia	Cre17.g717900	0.62
		g11	pherophorin PhG (formerly phV47)	Vocar.0001s0298	5217.68	10295.9	139.467	73.823	-6.206	2.66917e-26	gonidia	Cre17.g717950	0.47
		g12	high affinity nitrate transporter 2.3 related	Vocar.0008s0137	7593.48	14657.1	529.824	27.6642	-4.78995	1.75519e-37	gonidia	Cre09.g410800	0.89
		g13	septin	Vocar.0001s1120	6548.98	12663.7	434.279	29.1602	-4.86593	2.23791e-37	gonidia	Cre12.g556250	0.89
		g14	superoxide dismutase [Fe]	Vocar.0057s0039	16231.1	29400.9	3061.43	9.60362	-3.26358	4.13284e-06	gonidia	Cre10.g436050	0.94
		g15	L-ascorbate peroxidase (ascorbic acid peroxidase)	Vocar.0003s0432	6661.24	12744.4	578.087	22.0458	-4.46243	2.8624e-05	gonidia	Cre05.g233900	0.78
		g16	Serine-Threonine protein kinase	Vocar.0026s0032	5983.63	11465.8	501.446	22.8655	-4.5151	4.6599e-11	gonidia	Cre08.g373300	0.75
		g17	thiamine thiazole synthase 2	Vocar.0025s0048	11000.1	20220.2	1780.07	11.3593	-3.5058	1.01354e-23	gonidia	Cre04.g214150	0.94
		g18	basal body protein Babo1 (formerly Vop1)	Vocar.0024s0227	8945.95	16313.5	1578.45	10.3351	-3.36948	1.40843e-06	gonidia	Cre01.g002500	0.46
